# Supplementary material for: Application of mobile-macroscale scanning X-ray fluorescence (mobile-MA-XRF) imaging in paleontology: analyses of vertebrate fossil specimens from Messel conserved in different solid and liquid media
Source: Royal Society of Chemistry journal article supplement (doi:10.1039/d4ja00310a), 2025-01-01
Supplement: d4ja00310a1.xlsx [file d4ja00310a1.xlsx]

## Sheet: Dataset S1
Dataset S1. Mean values used in the statistical analysis. Specimens listed per Inv. No. (inventory number). Elements. ROI# (selected area number). Maximum (maximum pixel value of each element in the selected area). Minimum (minimum pixel value of each element in the selected area). # of pixels (number of selected pixels). Mean (mean of each element). StDev (standard deviation).
Inv. No.	Elements	ROI#	Maximum	Minimum	# of pixels	Mean	StDev	ROI#	Maximum	Minimum	# of pixels	Mean	StDev	ROI#	Maximum	Minimum	# of pixels	Mean	StDev	ROI#	Maximum	Minimum	# of pixels	Mean	StDev	ROI#	Maximum	Minimum	# of pixels	Mean	StDev	ROI#	Maximum	Minimum	# of pixels	Mean	StDev	ROI#	Maximum	Minimum	# of pixels	Mean	StDev	ROI#	Maximum	Minimum	# of pixels	Mean	StDev
SMF-ME-1583A	Ba	1	52.1707	0	416	11.9768	9.84074	2	44.6865	0	316	11.7788	8.01444	3	121.649	0	285	14.9901	17.4517	4	39.3818	0	128	9.09054	8.02286	5	63.4256	0	271	17.7808	13.9076	6	24.4631	0	590	7.99744	5.02512	7	65.6709	0	439	9.08457	7.85599	8	57.314	0	405	9.94267	7.44899
SMF-ME-1583A	Ca	1	222.335	73.1727	416	139.281	23.9932	2	285.341	12.4267	316	102.256	70.3736	3	171.651	23.3544	285	84.8466	32.6888	4	278.627	74.8053	128	173.211	42.1886	5	101.992	23.4515	271	60.0012	14.5946	6	55.1704	9.57	590	24.297	7.30366	7	49.6439	3.65313	439	17.651	8.15404	8	104.27	2.46684	405	42.7422	19.6158
SMF-ME-1583A	Co	1	55.2786	0	416	19.6506	10.3511	2	56.1462	0	316	17.5088	10.1372	3	104.019	3.22848	285	46.0869	17.8175	4	53.8189	0	128	24.0267	11.7934	5	73.7148	0	271	30.7342	14.8467	6	77.2024	0	590	27.8409	14.6626	7	89.828	0	439	31.1736	15.914	8	57.8141	0	405	21.2096	9.67382
SMF-ME-1583A	Cr	1	26.6236	5.98309	416	16.065	3.71609	2	24.1096	4.47389	316	13.3939	3.28606	3	53.9011	5.54354	285	18.5983	5.63534	4	42.9833	7.60329	128	16.5406	5.0576	5	27.102	8.56725	271	15.9584	3.50392	6	21.2804	2.89274	590	10.624	2.9794	7	21.252	0	439	9.90407	3.26761	8	24.9075	5.08217	405	13.0948	3.34279
SMF-ME-1583A	Cu	1	69.9559	9.37383	416	32.4039	9.88325	2	235.47	29.042	316	137.669	43.8127	3	207.766	25.8451	285	101.144	34.1891	4	174.591	26.3245	128	84.3322	33.8437	5	69.8393	12.315	271	24.8742	6.51258	6	51.0488	8.47932	590	26.5346	6.61022	7	65.0145	6.74029	439	23.2443	7.6006	8	63.9995	7.99696	405	30.4044	10.7201
SMF-ME-1583A	Fe	1	2341.04	425.19	416	1291.91	379.852	2	1664.44	398.163	316	996.26	224.053	3	3971.43	542.775	285	1429.38	563.516	4	2327.4	347.995	128	798.222	374.721	5	4691.71	1299.4	271	3605.88	605.325	6	5445.25	1148.11	590	3191.9	958.184	7	7212.44	1005.57	439	3933.43	1523.41	8	1360.34	37.6646	405	365.764	226.833
SMF-ME-1583A	K	1	7.39298	0	416	1.97834	1.64071	2	6.23244	0	316	1.62179	1.44272	3	7.18926	0	285	2.3682	1.63889	4	6.99486	0	128	2.23482	1.64808	5	7.84926	0	271	2.54702	1.72997	6	6.96447	0	590	1.5801	1.33038	7	7.75243	0	439	1.87439	1.45143	8	8.5499	0	405	2.08644	1.50332
SMF-ME-1583A	Mn	1	54.2083	6.46162	416	26.059	6.98621	2	38.3912	5.5845	316	20.9964	6.26624	3	88.7513	13.3331	285	37.8619	14.485	4	97.9056	25.4364	128	55.1022	14.9101	5	54.3435	8.36388	271	26.578	7.34033	6	30.1831	5.76517	590	15.3863	4.29827	7	34.4988	5.09544	439	14.5888	4.21727	8	32.104	5.53735	405	17.4021	4.46241
SMF-ME-1583A	Ni	1	64.1606	11.423	416	30.3393	8.51403	2	54.5481	11.6728	316	28.9743	8.2089	3	407.243	58.4709	285	194.102	70.2524	4	141.64	20.5189	128	67.7859	27.9229	5	81.1276	15.9013	271	39.2919	12.4752	6	41.4326	4.91975	590	19.0081	4.66533	7	44.745	3.83034	439	17.6977	6.40441	8	203.605	9.19101	405	75.4995	38.2371
SMF-ME-1583A	P	1	8.90671	0	416	2.62699	1.82871	2	10.9266	0	316	2.90703	1.90338	3	8.55412	0	285	2.2313	1.51005	4	5.98349	0	128	2.20711	1.66137	5	8.57561	0	271	2.41807	1.54447	6	8.02664	0	590	2.67687	1.50613	7	6.7604	0	439	2.51661	1.55748	8	9.37179	0	405	2.44551	1.65888
SMF-ME-1583A	Sr	1	151.694	8.42171	416	75.451	20.2706	2	121.325	0	316	66.5424	18.8436	3	126.482	14.4705	285	63.2946	18.8694	4	94.8364	17.8674	128	58.9704	15.8324	5	125.15	9.26172	271	59.2298	18.4688	6	135.644	11.0094	590	66.3483	20.1681	7	125.175	14.9945	439	61.4718	19.8373	8	129.312	21.0473	405	78.2764	20.8827
SMF-ME-1583A	S	1	14.1821	0.0834907	416	6.87191	2.51422	2	25.3414	0.393049	316	9.82707	4.57601	3	29.2644	2.77153	285	12.8346	4.09309	4	14.3241	1.49733	128	7.44866	2.60533	5	16.4895	0	271	5.41549	2.44764	6	87.5651	16.8214	590	45.1985	13.6622	7	87.758	9.83181	439	46.7988	15.3271	8	13.5211	0.120852	405	5.89702	2.65862
SMF-ME-1583A	Ti	1	101.712	7.12355	416	50.8027	14.6295	2	75.3686	0	316	13.222	11.1724	3	242.132	12.8078	285	82.7452	38.4167	4	177.853	0	128	45.4812	40.9619	5	170.107	30.0213	271	101.487	26.7937	6	23.5182	0	590	6.13697	4.93739	7	47.1202	0	439	10.7557	9.87987	8	85.821	0	405	23.1515	16.188
SMF-ME-1583A	Y	1	146.726	20.6778	416	77.2938	19.7954	2	132.777	19.6524	316	68.8365	18.5275	3	126.01	18.5985	285	63.0978	18.4709	4	127.531	27.3463	128	63.4517	18.9815	5	117.951	15.2031	271	56.6184	17.1116	6	155.49	17.2099	590	68.7181	19.9066	7	132.209	14.029	439	63.317	19.5417	8	136.861	8.18609	405	80.5009	22.272
SMF-ME-1583A	Zn	1	68.448	8.27169	416	33.8965	11.2111	2	75.7511	6.95863	316	39.8176	12.9963	3	624.404	46.0834	285	163.536	89.721	4	694.893	89.3455	128	241.241	114.402	5	60.3862	10.5854	271	28.3642	8.70488	6	70.8632	8.60984	590	26.347	8.58384	7	54.1544	9.65982	439	24.6215	7.34573	8	77.4285	4.11023	405	33.7847	12.413
SMF-ME-1583A	Zr	1	134.81	7.42301	416	61.2284	18.8215	2	106.049	4.90404	316	58.4025	19.2902	3	155.177	10.3877	285	64.5498	24.4303	4	156.995	29.3607	128	80.1472	27.3017	5	103.444	9.15947	271	49.0524	15.8382	6	123.454	0	590	56.322	19.1966	7	114.26	8.74864	439	52.101	17.2802	8	132.864	3.98075	405	62.5828	20.3807
SMF-ME-1583A	Ar	1	16.0586	0.294488	416	8.58003	2.73097	2	16.9136	1.62964	316	8.9199	2.88915	3	17.8104	1.69906	285	9.12619	2.75113	4	18.7932	2.66545	128	9.84028	3.0185	5	19.8039	2.36749	271	9.25912	2.73225	6	16.2006	0.331427	590	7.81593	2.53048	7	20.3031	0.832904	439	8.08716	2.93018	8	17.6525	1.51217	405	8.60068	2.7626
SMF-ME-1583A	Cl	1	9.08985	0	416	2.58076	2.07761	2	11.8154	0	316	3.35542	2.45266	3	10.8591	0	285	2.73361	2.22574	4	6.26771	0	128	2.23113	1.77714	5	9.6715	0	271	2.21575	1.9998	6	10.3237	0	590	2.50468	2.06728	7	11.2591	0	439	2.66239	2.05635	8	11.0262	0	405	3.16418	2.25148
SMF-ME-1583A	Si	1	9.52625	0	416	2.27995	1.65912	2	7.43475	0	316	2.24883	1.55987	3	12.0234	0	285	2.73543	1.89172	4	11.939	0	128	2.58443	2.20774	5	7.90341	0	271	2.73809	1.80015	6	7.54919	0	590	2.30465	1.58964	7	8.0809	0	439	2.54835	1.76298	8	8.83044	0	405	2.26599	1.6413
SMF-ME-1583A	Sn	1	52.1143	16.1808	416	34.317	5.34464	2	47.6789	16.6107	316	29.1055	4.94699	3	45.9341	13.1505	285	28.0126	5.65103	4	29.5076	11.0421	128	19.1587	4.31855	5	49.1376	22.3816	271	34.9287	5.42233	6	61.0431	26.4953	590	41.2511	5.81169	7	62.6137	18.4338	439	41.1862	6.87795	8	45.5297	17.3638	405	29.9352	4.68456
SMF-ME-11412A	Ba	1	45.1469	0	77	13.7598	12.3225	2	35.4761	0	166	8.11628	6.28669	3	22.6619	0	50	8.07355	5.78795	4	46.3717	0	183	11.8725	10.7387	5	24.8655	0	129	6.77422	4.97424	6	54.1922	0	76	14.2382	13.1503	7	21.2524	0	107	7.79476	5.35184
SMF-ME-11412A	Ca	1	121.209	0	77	69.0906	28.5139	2	171.068	0	166	78.1921	46.8398	3	104.082	0	50	39.3069	26.0593	4	142.214	0	183	60.3614	33.9737	5	36.2811	0	129	11.713	9.92333	6	194.336	48.3224	76	123.306	34.6572	7	65.2773	0	107	24.4521	16.6657
SMF-ME-11412A	Co	1	37.5119	1.68862	77	16.5833	7.37345	2	72.3539	0	166	21.283	11.7089	3	50.7261	0	50	20.5788	10.6206	4	55.2218	0	183	20.63	10.5792	5	50.7932	0	129	18.8824	9.76412	6	60.446	0	76	25.4148	13.5893	7	54.296	0	107	18.4681	10.6836
SMF-ME-11412A	Cr	1	38.5425	12.7036	77	20.3941	4.87877	2	27.4272	7.0743	166	15.7157	3.65982	3	29.5098	11.2735	50	16.0671	3.52092	4	34.8483	10.2385	183	19.1264	4.18852	5	27.3738	5.76775	129	15.5737	3.51521	6	35.8404	11.9819	76	22.0468	5.32223	7	27.2731	8.89783	107	16.5369	3.66469
SMF-ME-11412A	Cu	1	103.458	11.901	77	52.7202	19.6406	2	145.524	20.3263	166	79.4395	23.7752	3	191.409	8.83324	50	102.074	44.5694	4	89.0957	17.511	183	45.4479	14.907	5	99.8099	11.3909	129	54.9972	16.4562	6	170.138	32.9986	76	100.312	25.4876	7	123.196	28.7014	107	78.5422	21.2177
SMF-ME-11412A	Fe	1	519.347	71.7938	77	242.386	94.9865	2	1557.92	155.224	166	759.125	384.003	3	758.18	208.129	50	414.247	138.828	4	778.879	97.3574	183	354.028	137.429	5	898.638	140.542	129	407.572	164.573	6	2163.89	421.503	76	1168.75	363.964	7	927.488	188.391	107	430.883	126.475
SMF-ME-11412A	K	1	6.00902	0	77	1.4203	1.32192	2	5.52319	0	166	1.19597	1.19333	3	5.71728	0	50	1.32647	1.39618	4	5.92191	0	183	1.59447	1.45412	5	6.28953	0	129	1.32607	1.38985	6	9.56703	0	76	2.1128	1.96213	7	5.90289	0	107	1.35442	1.47174
SMF-ME-11412A	Mn	1	39.4242	8.21306	77	23.4713	6.67716	2	28.0974	5.65497	166	15.805	4.60704	3	25.89	6.11644	50	15.8384	4.95877	4	42.8018	7.98919	183	20.8049	6.93182	5	27.2109	4.47696	129	15.0746	4.37307	6	33.7102	8.09707	76	19.2307	6.01518	7	26.971	7.51456	107	14.8799	4.18591
SMF-ME-11412A	Ni	1	58.818	15.4494	77	34.388	10.1184	2	117.068	9.54369	166	49.8408	18.0108	3	78.3093	15.9264	50	38.6729	13.2941	4	69.3136	6.99613	183	34.5146	12.6364	5	61.8762	9.33534	129	30.1724	10.6297	6	131.988	25.712	76	61.0376	23.1569	7	69.019	8.58834	107	34.7064	12.4733
SMF-ME-11412A	P	1	8.27993	0	77	2.75184	1.66112	2	8.61352	0	166	3.20385	1.79014	3	7.12564	0.380142	50	3.48397	1.66346	4	7.99876	0	183	3.20986	1.63365	5	7.18835	0	129	3.02802	1.51671	6	8.37902	0	76	3.32888	1.92489	7	7.6917	0	107	2.74194	1.69603
SMF-ME-11412A	Sr	1	184.579	41.0874	77	103.153	24.9884	2	171.738	50.2074	166	101.481	24.0002	3	151.306	45.186	50	96.3366	20.0077	4	155.773	43.5492	183	96.8878	22.4468	5	157.671	42.2643	129	101.733	23.5345	6	151.723	54.1047	76	96.5804	23.1973	7	171.738	45.1089	107	98.1708	24.3312
SMF-ME-11412A	S	1	18.5226	3.43508	77	10.1111	3.29826	2	27.0716	5.40021	166	14.9477	4.42786	3	24.6895	3.13017	50	12.9006	4.12435	4	20.7327	2.67871	183	10.8318	3.53464	5	32.1639	7.85493	129	18.4104	5.30093	6	27.8344	8.44272	76	15.5862	4.25907	7	28.2879	7.45853	107	17.3908	3.97389
SMF-ME-11412A	Ti	1	114.968	16.9109	77	66.0645	23.8867	2	37.3925	0	166	11.4791	8.05252	3	22.0227	0	50	7.85979	5.91752	4	120.127	7.23636	183	53.7147	23.811	5	15.9952	0	129	5.55148	4.25661	6	146.43	16.3413	76	85.516	31.7267	7	42.2835	0	107	8.61104	6.68465
SMF-ME-11412A	Y	1	159.442	49.4734	77	104.134	21.1504	2	177.921	52.5882	166	103.718	22.3022	3	166.383	42.6119	50	99.8326	23.6221	4	173.862	0	183	101.867	26.5606	5	180.252	34.7838	129	105.026	22.7343	6	162.958	44.6321	76	97.8307	22.5649	7	147.171	32.249	107	97.1271	24.7556
SMF-ME-11412A	Zn	1	110.046	28.9294	77	71.8142	19.3323	2	165.777	26.6537	166	92.6589	26.5062	3	101.53	20.4646	50	70.312	16.6975	4	153.171	23.0703	183	73.3022	25.6003	5	110.746	5.36183	129	54.5977	18.4071	6	1511.36	119.708	76	299.529	194.399	7	115.67	22.1835	107	68.6702	17.7466
SMF-ME-11412A	Zr	1	149.494	28.852	77	82.6621	22.0192	2	153.681	25.5818	166	80.9749	21.8697	3	130.231	45.4736	50	85.1657	22.6965	4	138.203	24.6942	183	84.1999	20.5884	5	138.202	12.912	129	81.7323	19.9538	6	226.868	29.7642	76	84.1593	30.5579	7	149.753	19.5487	107	78.3077	22.3431
SMF-ME-11412A	Ar	1	17.3819	3.73995	77	11.5248	3.07489	2	18.7517	4.68965	166	11.0023	3.01682	3	17.0818	4.04797	50	10.5336	2.50684	4	18.0946	2.3733	183	10.5738	3.10357	5	18.523	5.09199	129	10.6091	2.8513	6	18.1781	4.58681	76	9.96235	2.99883	7	21.9223	3.33933	107	10.7811	3.1626
SMF-ME-11412A	Cl	1	18.9118	2.99251	77	10.0608	3.8372	2	23.1732	0	166	9.35602	4.23486	3	19.2855	3.50111	50	12.4019	3.50067	4	24.8541	0	183	10.2278	4.23138	5	25.6252	5.76885	129	13.391	4.005	6	17.8907	0.329881	76	6.89559	3.76575	7	25.203	1.0038	107	12.4614	4.73166
SMF-ME-11412A	Si	1	7.44531	0	77	2.7887	1.77241	2	7.89569	0	166	2.50042	1.68473	3	8.70911	0	50	2.87675	2.16239	4	9.0278	0	183	3.37293	1.98751	5	7.67549	0	129	2.63362	1.72178	6	8.1967	0	76	3.05323	1.9775	7	7.90992	0	107	2.30608	1.63396
SMF-ME-11412A	Sn	1	53.313	22.2978	77	35.8136	5.42604	2	51.6892	24.2806	166	36.7018	5.44693	3	47.3404	24.3181	50	36.9398	4.6787	4	48.3957	21.226	183	35.8141	5.04541	5	48.1364	23.3328	129	35.7347	5.04454	6	57.5262	27.4126	76	38.3447	5.39042	7	44.0254	23.3053	107	33.6584	4.55015
SMF-ME-11295A	Ba	1	51.8266	0	334	14.0019	9.19955	2	365.092	0	210	80.9762	75.3979	3	252.213	0	578	21.4543	20.953	4	107.386	0	477	13.3788	9.50047
SMF-ME-11295A	Ca	1	600.338	12.1108	334	88.0758	73.2421	2	161.838	27.4026	210	83.0629	22.8493	3	138.397	35.3029	578	83.6003	17.708	4	120.282	6.7229	477	36.0976	22.4855
SMF-ME-11295A	Co	1	105.171	0	334	42.5715	19.588	2	93.3888	1.80869	210	42.9379	19.9745	3	105.186	0	578	40.5904	19.7335	4	106.867	0	477	26.292	15.7208
SMF-ME-11295A	Cr	1	28.9167	7.04997	334	17.5706	3.98762	2	37.3398	3.88728	210	17.9321	5.84421	3	35.6182	3.81275	578	18.6987	4.41282	4	77.3551	7.19965	477	17.2683	5.17523
SMF-ME-11295A	Cu	1	159.827	18.9405	334	76.2269	25.3896	2	80.8926	7.93048	210	28.7039	8.45213	3	62.6545	11.653	578	25.776	7.19585	4	138.058	11.9979	477	54.8645	22.0773
SMF-ME-11295A	Fe	1	9571.55	1006.29	334	2435.43	1282.35	2	8090.96	640.268	210	4904.7	1738.9	3	8231.54	986.805	578	4893.03	1735.37	4	8020.54	258.305	477	1165.35	1047.47
SMF-ME-11295A	K	1	7.92982	0	334	2.23386	1.64888	2	10.1679	0	210	3.53181	1.99669	3	11.9765	0	578	3.50253	1.98657	4	6.62853	0	477	2.06498	1.53922
SMF-ME-11295A	Mn	1	81.7767	4.80941	334	29.4266	11.4218	2	119.485	6.70779	210	52.2077	22.6676	3	230.018	11.0673	578	83.3396	35.6539	4	38.122	3.46226	477	17.8981	5.54344
SMF-ME-11295A	Ni	1	172.538	15.1864	334	83.2995	29.3542	2	58.3826	1.26986	210	29.546	7.46765	3	54.4872	10.4576	578	26.3896	7.2897	4	127.018	9.83048	477	49.4811	19.7928
SMF-ME-11295A	P	1	10.9184	0	334	3.76257	1.97047	2	12.7757	0.0404136	210	3.62611	1.96727	3	9.6692	0	578	3.61554	1.80272	4	10.8011	0	477	3.40384	1.73945
SMF-ME-11295A	Sr	1	155.252	19.3035	334	84.8864	22.2176	2	171.627	29.3192	210	88.0652	27.691	3	162.206	19.0844	578	89.6202	23.4689	4	207.984	9.82083	477	100.084	25.8919
SMF-ME-11295A	S	1	108.123	3.3279	334	16.6942	12.3906	2	27.836	3.95972	210	12.3391	4.27877	3	29.7005	0.766165	578	8.0386	3.53724	4	40.3393	0.996234	477	11.9538	7.22635
SMF-ME-11295A	Ti	1	105.425	0	334	22.1356	14.7427	2	262.223	0	210	139.075	46.2769	3	221.106	33.2355	578	129.769	34.0826	4	60.3037	0	477	14.9083	9.43892
SMF-ME-11295A	Y	1	149.587	28.1085	334	88.6982	23.0517	2	134.677	17.9639	210	69.3928	21.4908	3	166.312	20.5768	578	86.5849	24.5534	4	178.775	33.3868	477	107.205	24.3548
SMF-ME-11295A	Zn	1	819.756	52.6974	334	428.73	171.725	2	81.0899	10.4813	210	37.5849	12.2346	3	106.904	13.2683	578	35.4159	12.1571	4	869.339	16.8215	477	172.001	132.458
SMF-ME-11295A	Zr	1	154.595	1.46631	334	75.2555	22.5647	2	123.21	17.4357	210	63.3376	21.2865	3	152.279	9.16658	578	73.9335	23.3435	4	178.84	22.8341	477	84.9817	23.3794
SMF-ME-11295A	Ar	1	22.6404	3.90804	334	13.454	3.58306	2	25.0158	5.12746	210	14.2892	3.74334	3	24.7878	5.11033	578	13.0813	3.42085	4	25.5556	2.23499	477	13.1742	3.57016
SMF-ME-11295A	Cl	1	31.6437	0	334	11.8758	5.85383	2	23.8243	0	210	4.62921	3.61635	3	21.2723	0	578	4.25244	3.04802	4	36.1025	0	477	12.2498	4.99722
SMF-ME-11295A	Si	1	8.634	0	334	3.06611	1.79795	2	10.1296	0	210	4.10145	2.12289	3	11.8254	0	578	4.27537	2.22892	4	11.4683	0	477	2.87136	1.83868
SMF-ME-11295A	Sn	1	60.7658	24.0059	334	39.6131	5.48903	2	59.2644	20.7216	210	39.3296	7.04045	3	66.928	24.4035	578	46.6727	6.48886	4	62.7061	25.2172	477	38.8631	5.83006
SMF-ME-1758A	Ba	1	52.9964	0	95	16.0994	13.7948	2	68.2333	0	70	18.8315	15.9788	3	44.972	0	69	14.9891	11.1211	4	35.5585	0	87	12.424	8.68654	5	49.7723	0	110	17.0334	12.151
SMF-ME-1758A	Ca	1	214.652	10.4844	95	87.1943	53.5523	2	1339.97	108.929	70	269.23	173.632	3	612.312	35.6271	69	93.7899	85.5786	4	77.0745	23.8842	87	45.5568	13.2282	5	135.392	55.0392	110	84.5772	16.2398
SMF-ME-1758A	Co	1	87.7332	0	95	26.6813	17.3367	2	167.677	22.2544	70	66.2873	34.2814	3	51.1912	0	69	24.5388	11.1396	4	40.6245	0	87	19.105	9.58601	5	98.9887	1.54953	110	42.3834	17.7327
SMF-ME-1758A	Cr	1	25.9951	9.67233	95	16.1771	3.42415	2	28.0625	6.74622	70	16.0216	4.50622	3	22.881	4.21955	69	14.7233	3.59297	4	22.9611	8.43629	87	14.3782	3.23526	5	22.8727	7.85621	110	14.4626	3.66226
SMF-ME-1758A	Cu	1	103.434	6.83996	95	39.1848	15.9277	2	73.741	8.16058	70	30.7925	12.0591	3	70.8345	16.4293	69	37.9162	12.4839	4	77.5147	17.2417	87	37.9119	11.5627	5	40.094	11.0123	110	24.0693	5.21056
SMF-ME-1758A	Fe	1	7052.5	118.663	95	1543.12	1718.16	2	3494.23	461.508	70	1252.37	493.3	3	1429.72	358.135	69	950.671	269.359	4	2163.32	379.418	87	962.744	316.812	5	5880.59	4122.27	110	4807.66	306.234
SMF-ME-1758A	K	1	9.18629	0	95	3.02336	1.95548	2	6.53542	0	70	2.84957	1.79502	3	8.20735	0	69	2.69263	1.88333	4	8.17695	0	87	2.64996	1.83878	5	7.04338	0	110	3.0051	1.72634
SMF-ME-1758A	Mn	1	104.971	11.317	95	37.6866	20.7632	2	75.7986	11.1947	70	32.2404	15.4736	3	53.212	7.5871	69	22.992	8.25745	4	41.5371	6.2725	87	24.4648	7.62651	5	366.482	146.524	110	251.353	49.6145
SMF-ME-1758A	Ni	1	68.3231	13.5172	95	30.8822	11.0037	2	903.81	43.4089	70	309.139	211.872	3	93.3377	21.845	69	47.4517	14.538	4	52.4346	7.55418	87	29.0892	9.6172	5	33.8587	12.7903	110	21.434	4.5379
SMF-ME-1758A	P	1	9.08321	0.0822024	95	3.53298	1.75785	2	10.3919	0	70	3.0379	2.21722	3	8.37659	0	69	2.81598	1.87876	4	7.3814	0	87	2.93744	1.78373	5	8.41313	0	110	3.17365	1.87474
SMF-ME-1758A	Sr	1	165.509	51.6685	95	101.582	24.9222	2	121.319	22.3314	70	70.238	21.549	3	146.288	39.0893	69	83.9252	22.5365	4	145.797	44.7838	87	93.4969	21.1291	5	119.683	0	110	77.4602	19.0622
SMF-ME-1758A	S	1	15.983	0.166427	95	7.80833	3.20268	2	23.6628	1.73544	70	12.257	4.60055	3	21.3083	2.6953	69	10.2649	3.64392	4	14.9529	2.75291	87	8.06474	2.84274	5	13.9657	2.05409	110	7.39357	2.25239
SMF-ME-1758A	Ti	1	182.749	0	95	60.8321	46.4485	2	295.47	23.8402	70	160.49	61.5773	3	134.833	20.2853	69	62.579	26.5445	4	59.9663	2.31364	87	28.5874	13.4709	5	135.586	36.618	110	90.7311	19.7647
SMF-ME-1758A	Y	1	174.133	22.1452	95	101.201	25.8659	2	122.837	20.9659	70	67.6275	18.8166	3	160.776	42.403	69	79.3627	22.1245	4	166.039	39.256	87	95.4099	24.9192	5	128.92	9.66068	110	72.5695	21.4748
SMF-ME-1758A	Zn	1	444.348	11.2544	95	59.6017	44.8469	2	417.169	34.3187	70	82.6725	53.5166	3	94.2186	11.3797	69	51.5626	17.6626	4	90.2739	14.7675	87	48.1541	15.6979	5	47.8316	14.5646	110	27.3563	6.53585
SMF-ME-1758A	Zr	1	151.639	29.615	95	84.4643	24.499	2	161.969	17.6694	70	76.8993	36.1468	3	138.055	26.972	69	70.1409	20.3995	4	118.007	29.3789	87	78.8992	17.0728	5	106.041	22.5221	110	63.2874	20.1652
SMF-ME-1758A	Ar	1	21.3513	5.33445	95	12.2926	3.2693	2	21.4942	6.08206	70	14.478	3.53722	3	21.868	5.1798	69	14.1423	3.83703	4	22.1622	6.86196	87	13.9663	3.21348	5	22.4229	6.8054	110	13.568	3.42476
SMF-ME-1758A	Cl	1	10.5539	0	95	3.59604	2.61366	2	8.62134	0	70	2.85143	2.51152	3	7.07194	0	69	3.07303	2.2261	4	11.8357	0	87	2.68799	2.28987	5	7.66175	0	110	2.29099	1.78804
SMF-ME-1758A	Si	1	8.73983	0	95	4.0453	1.91258	2	7.3539	0	70	2.81728	2.08074	3	11.1768	0	69	3.90672	2.06614	4	8.57124	0	87	3.4787	1.95176	5	9.02347	0	110	3.62587	1.91805
SMF-ME-1758A	Sn	1	58.2129	20.172	95	40.2434	7.29722	2	40.9641	17.3814	70	28.0445	5.27509	3	45.0147	17.4661	69	30.4467	5.01413	4	48.3318	19.8823	87	34.0004	5.20334	5	53.9141	29.1772	110	44.3969	4.77983
SMF-ME-11414A	Ba	1	32.2085	0	76	12.903	8.04405	2	59.7223	0	69	18.9825	13.1078	3	41.0649	0	46	13.4453	8.94854
SMF-ME-11414A	Ca	1	30.9509	5.28526	76	14.0758	5.03213	2	2798.23	9.44579	69	1548.23	927.719	3	135.76	3.80185	46	65.1957	43.1988
SMF-ME-11414A	Co	1	38.4151	0	76	17.8731	7.70584	2	46.8515	2.12949	69	18.1855	9.19924	3	39.2297	3.68379	46	20.1216	8.92788
SMF-ME-11414A	Cr	1	24.1799	8.39931	76	14.9842	3.08676	2	27.3492	4.74927	69	14.2283	4.71703	3	26.9979	8.84396	46	17.2626	4.08025
SMF-ME-11414A	Cu	1	88.0978	11.9305	76	38.7731	15.1354	2	76.0837	12.3054	69	27.2424	13.5423	3	76.4926	16.6321	46	41.8426	15.5656
SMF-ME-11414A	Fe	1	715.51	180.809	76	373.609	118.575	2	1586.09	151.522	69	637.916	248.731	3	968.681	37.0932	46	280.467	191.722
SMF-ME-11414A	K	1	13.8811	0	76	3.53514	2.24411	2	8.75372	0	69	4.03194	2.08338	3	4.78077	0	46	2.20596	1.40742
SMF-ME-11414A	Mn	1	31.7015	7.48123	76	19.6218	5.69006	2	231.005	24.9834	69	100.882	43.3256	3	225.518	9.18953	46	44.5938	48.9516
SMF-ME-11414A	Ni	1	53.84	9.24858	76	30.725	10.7505	2	63.7863	17.3017	69	27.463	7.83224	3	71.4461	6.63518	46	32.8596	13.4608
SMF-ME-11414A	P	1	8.08579	0.259077	76	3.70919	1.73256	2	59.0942	0	69	13.8013	11.8899	3	9.40999	0.687876	46	3.91872	1.89571
SMF-ME-11414A	Sr	1	219.207	39.8705	76	98.9764	25.0667	2	183.346	30.2953	69	116.002	27.14	3	168.841	56.0849	46	99.2379	22.2721
SMF-ME-11414A	S	1	8.26606	0.38833	76	4.10337	1.7308	2	19.927	2.86765	69	10.3374	3.91957	3	17.942	1.84849	46	8.85864	4.17039
SMF-ME-11414A	Ti	1	41.1125	0.431424	76	20.2625	8.95409	2	119.83	0.361321	69	36.6897	29.7645	3	145.73	0	46	38.8933	31.2735
SMF-ME-11414A	Y	1	142.982	16.2705	76	99.8274	23.5929	2	177.228	53.4205	69	111.497	28.6393	3	157.557	55.2406	46	104.335	23.5396
SMF-ME-11414A	Zn	1	82.2721	0	76	42.6923	16.0462	2	91.3728	18.9505	69	43.378	13.9563	3	73.8894	13.5934	46	42.4308	14.7211
SMF-ME-11414A	Zr	1	146.205	13.1572	76	83.5515	25.7668	2	339.954	41.0379	69	164.836	63.5326	3	144.35	25.4959	46	86.4629	23.3404
SMF-ME-11414A	Ar	1	15.3201	2.18287	76	7.92407	2.97384	2	16.4491	2.80021	69	9.7627	3.05086	3	18.1852	3.36083	46	8.8163	2.66498
SMF-ME-11414A	Cl	1	23.2148	4.37551	76	15.4086	4.35104	2	25.451	0.419331	69	7.67263	4.9606	3	32.1842	4.55591	46	15.8435	6.86596
SMF-ME-11414A	Si	1	14.3473	2.44777	76	7.69954	2.68423	2	11.6419	0.61713	69	5.10697	2.34566	3	10.7375	0.0521097	46	4.78912	2.43452
SMF-ME-11414A	Sn	1	52.8064	21.3473	76	36.1515	5.5082	2	48.6926	18.1533	69	31.658	6.37038	3	45.8553	24.6113	46	36.5568	5.10214
SMF-ME-11797A	Ba	1	73.371	0	300	17.8487	14.7153	2	65.6543	0	201	18.6842	15.2396	3	114.687	0	281	23.1969	16.8675	4	64.73	0	171	13.2666	11.9772	5	56.8676	0	118	16.3859	14.1064
SMF-ME-11797A	Ca	1	250.345	8.30284	300	137.579	58.0528	2	238.748	43.3167	201	155.058	39.7168	3	2628.59	25.8752	281	776.841	516.442	4	1086.74	17.2689	171	116.572	138.379	5	204.824	56.928	118	125.71	31.5374
SMF-ME-11797A	Co	1	49.174	0	300	19.5006	9.1165	2	48.3585	0.403699	201	20.3262	8.43813	3	42.5836	0	281	17.3083	9.09305	4	51.5036	0	171	17.566	9.8472	5	51.3942	0.557519	118	20.4787	9.45624
SMF-ME-11797A	Cr	1	47.4764	8.77968	300	24.5508	6.63608	2	45.0413	12.9689	201	24.5031	5.50634	3	72.2933	3.71554	281	25.6735	9.9142	4	34.1944	2.19248	171	18.3952	5.39909	5	35.1124	11.4307	118	22.1148	4.80396
SMF-ME-11797A	Cu	1	77.553	7.00964	300	38.7035	14.1592	2	74.1632	9.79013	201	37.5349	13.2745	3	67.2169	4.70524	281	27.7864	9.46693	4	157.079	19.0628	171	89.4246	29.5078	5	82.8114	9.65425	118	40.6509	14.1646
SMF-ME-11797A	Fe	1	469.995	74.6482	300	300.165	68.5702	2	478.43	95.011	201	271.936	79.665	3	4645.3	110.054	281	921.936	674.112	4	1162.23	91.443	171	477.145	175.732	5	647.215	127.412	118	326.604	85.5156
SMF-ME-11797A	K	1	17.9191	0	300	6.16521	3.12177	2	8.44237	0	201	2.39345	1.60154	3	11.3916	0	281	3.31163	2.15295	4	7.74301	0	171	2.96505	1.74206	5	11.0359	0	118	3.6238	2.3107
SMF-ME-11797A	Mn	1	59.0985	6.08196	300	30.4351	10.5444	2	68.9105	10.738	201	36.3327	11.2182	3	157.499	11.4946	281	75.1361	31.3274	4	98.794	4.72994	171	26.6259	13.0854	5	52.8536	10.5507	118	24.1987	7.11359
SMF-ME-11797A	Ni	1	113.772	8.12141	300	46.4332	16.4246	2	85.432	11.1451	201	43.8175	15.0719	3	67.8362	10.4309	281	31.0057	9.66695	4	80.8776	7.34628	171	34.8092	13.094	5	135.131	19.3548	118	67.6057	25.5786
SMF-ME-11797A	P	1	9.95447	0	300	3.14836	1.82931	2	8.17019	0	201	2.81765	1.72934	3	33.029	0	281	4.40703	4.86368	4	10.8208	0	171	3.46214	2.00419	5	9.11088	0	118	3.04676	1.76127
SMF-ME-11797A	Sr	1	172.383	37.6906	300	103.595	23.4394	2	168.589	29.4087	201	104.172	21.8125	3	210.533	27.0886	281	115.478	27.6576	4	147.96	20.0001	171	83.5921	23.6143	5	149.269	41.7904	118	98.7032	21.4124
SMF-ME-11797A	S	1	18.1981	0.349653	300	8.46096	3.05129	2	21.456	3.19527	201	9.96524	2.80184	3	21.5309	2.59853	281	11.1582	3.77188	4	35.8974	3.77838	171	18.5279	5.62429	5	24.7549	6.33169	118	13.3789	3.7397
SMF-ME-11797A	Ti	1	220.485	12.7787	300	133.293	46.6757	2	234.368	16.5213	201	123.115	41.2485	3	384.517	3.31189	281	139.728	70.9524	4	201.527	0	171	58.7527	38.4097	5	168.915	33.8551	118	89.0054	28.4894
SMF-ME-11797A	Y	1	175.678	15.3153	300	104.223	24.2933	2	166.849	46.9645	201	103.084	21.6177	3	211.157	24.4805	281	118.294	28.2821	4	133.942	22.0879	171	84.4432	21.5402	5	191.973	54.1082	118	104.523	22.8012
SMF-ME-11797A	Zn	1	115.221	6.17824	300	60.2322	20.2132	2	112.609	11.8822	201	54.4154	18.1009	3	257.437	15.8216	281	92.9606	41.2051	4	276.089	22.6575	171	105.582	44.2878	5	121.019	20.7624	118	67.5745	20.4614
SMF-ME-11797A	Zr	1	153.308	25.048	300	79.6375	22.0619	2	142.137	19.2406	201	79.6385	21.1877	3	297.434	10.6849	281	143.583	50.5721	4	140.799	20.0948	171	70.8368	22.7299	5	151.332	25.7122	118	84.0995	23.8646
SMF-ME-11797A	Ar	1	18.3853	3.12373	300	9.95072	2.77624	2	21.6583	2.48415	201	10.3938	3.03195	3	19.8026	3.25771	281	10.6506	3.14708	4	19.2211	2.71847	171	11.0122	3.11261	5	19.2715	1.99047	118	10.2362	3.18258
SMF-ME-11797A	Cl	1	20.3234	0	300	7.00588	3.40977	2	18.0769	0.10556	201	7.18609	3.20735	3	18.9616	0	281	7.17203	3.66819	4	22.1701	0	171	8.6104	4.19018	5	19.2926	0	118	7.96663	3.64824
SMF-ME-11797A	Si	1	11.3259	0.492221	300	5.1197	2.0947	2	9.0832	0.17485	201	3.99537	1.94082	3	13.6024	0.360046	281	4.53955	2.19353	4	8.1249	0.474229	171	3.73979	1.72756	5	9.80742	0.157167	118	3.96746	1.91996
SMF-ME-11390A	Ba	1	53.0554	0	217	20.234	10.1115	2	69.5174	0	156	22.0324	11.9254	3	58.105	0	152	22.0235	13.8261	4	58.049	0	171	23.5525	11.4956	5	47.3601	2.26219	196	21.7779	8.45059	6	53.0334	0	288	23.0671	11.6903	7	55.2455	1.0419	245	25.5189	10.5823
SMF-ME-11390A	Ca	1	140.225	3.54284	217	30.4825	28.6079	2	1310.34	16.2922	156	178.505	225.803	3	755.067	25.2582	152	123.356	108.235	4	184.214	21.7065	171	68.7145	26.4642	5	126.623	0	196	19.2894	12.6371	6	1092.73	13.8565	288	156.038	215.597	7	74.1236	13.9262	245	39.2631	11.3353
SMF-ME-11390A	Co	1	90.5855	0	217	20.4448	11.3911	2	89.8539	0	156	30.2595	20.3084	3	70.2187	0	152	31.703	16.0803	4	108.202	4.47471	171	49.2897	18.3727	5	108.148	0	196	54.1747	21.913	6	119.486	0	288	47.9584	25.9876	7	85.4476	0	245	39.7931	17.7014
SMF-ME-11390A	Cr	1	26.2318	6.61088	217	16.1786	3.80314	2	35.1241	5.8565	156	15.4581	4.52602	3	32.6342	4.87647	152	18.7151	4.97316	4	25.8189	7.08679	171	15.4342	3.84678	5	22.6364	3.97933	196	12.8981	3.22665	6	31.9648	5.9596	288	16.4197	4.42541	7	31.3499	4.82914	245	15.1236	3.87291
SMF-ME-11390A	Cu	1	143.602	15.532	217	67.1502	27.9644	2	238.632	14.7502	156	94.8462	60.3384	3	299.728	22.7062	152	164.046	59.9666	4	59.0367	14.2891	171	32.1183	7.67468	5	41.9991	14.1719	196	24.1233	4.85719	6	76.4714	11.0286	288	33.9191	12.6869	7	45.8663	13.8386	245	25.5834	5.3164
SMF-ME-11390A	Fe	1	2437.74	225.227	217	931.208	316.419	2	6589.95	274.126	156	2487.71	1771.1	3	4477.49	452.425	152	2756.95	958.232	4	7811.04	2204.51	171	5542.73	1074.7	5	8373.15	4310.18	196	6541.93	915.021	6	10164.1	660.623	288	5469.33	2962.71	7	6645.54	3390.29	245	4781.47	711.548
SMF-ME-11390A	K	1	5.06992	0	217	1.2847	1.14324	2	42.5147	0	156	3.16038	6.03039	3	6.72539	0	152	1.88877	1.56791	4	11.9386	0	171	2.1653	1.74271	5	6.1447	0	196	1.753	1.43891	6	7.37526	0	288	1.83343	1.43157	7	6.86182	0	245	2.17501	1.53892
SMF-ME-11390A	Mn	1	254.223	28.3605	217	106.265	41.3028	2	266.485	25.3524	156	167.448	50.3426	3	332.976	66.8427	152	249.683	43.3425	4	213.216	47.4177	171	130.146	29.0419	5	143.526	38.0818	196	89.0853	21.7613	6	329.719	86.6232	288	195.899	53.3439	7	113.789	36.0367	245	70.8042	14.5233
SMF-ME-11390A	Ni	1	52.4882	10.2381	217	27.4986	8.46789	2	60.9376	11.0782	156	27.3927	7.71576	3	55.7378	7.9476	152	30.4958	8.48346	4	35.8458	9.25846	171	22.2262	5.9111	5	33.843	8.78963	196	20.2372	4.67723	6	60.556	8.04192	288	24.1502	7.90085	7	43.0181	11.0113	245	22.8264	5.98159
SMF-ME-11390A	P	1	4.59537	0	217	1.11019	1.04723	2	9.35113	0	156	1.64658	1.54654	3	4.591	0	152	1.24202	1.0819	4	6.50679	0	171	1.63674	1.37874	5	6.80238	0	196	1.66681	1.24901	6	6.03695	0	288	1.59748	1.34475	7	5.62756	0	245	1.7236	1.27732
SMF-ME-11390A	Sr	1	125.66	16.6977	217	59.609	17.2717	2	100.838	15.7397	156	51.6096	19.1225	3	105.285	20.9036	152	43.2776	12.8178	4	81.3289	20.9376	171	41.1807	9.88176	5	73.735	20.7159	196	40.6539	9.29727	6	136.621	18.775	288	52.4629	28.478	7	87.9033	27.0982	245	53.7294	12.8128
SMF-ME-11390A	S	1	7.48879	0	217	1.43916	1.38991	2	9.47314	0	156	2.82669	2.0477	3	9.53746	0	152	3.00314	2.16366	4	8.76665	0	171	3.43722	2.04196	5	7.44992	0	196	1.63856	1.22868	6	9.6816	0	288	2.88773	2.03484	7	10.3338	0	245	3.09678	2.11971
SMF-ME-11390A	Ti	1	123.084	0	217	26.828	24.5342	2	101.65	0	156	37.5546	27.6216	3	142.878	0	152	83.7513	29.5201	4	90.8454	8.07578	171	43.1259	15.9956	5	40.6884	0	196	14.7455	8.68525	6	131.923	0	288	47.7245	30.4633	7	81.3005	12.6166	245	39.2078	12.5142
SMF-ME-11390A	Y	1	100.716	23.6878	217	54.046	13.5588	2	85.3202	16.758	156	46.7926	16.1681	3	110.789	21.754	152	40.3392	13.0152	4	53.8085	18.4832	171	35.5214	6.9312	5	54.5377	19.2234	196	33.9488	6.51522	6	151.291	21.5736	288	47.8516	27.7224	7	68.6546	17.5415	245	37.3928	8.81862
SMF-ME-11390A	Zn	1	152.049	31.4694	217	73.9205	20.1064	2	120.299	24.1182	156	62.782	18.5985	3	140.06	35.1469	152	80.7188	18.9429	4	73.0683	19.6565	171	40.9853	10.541	5	46.6334	17.6965	196	28.8275	5.53392	6	182.89	18.1413	288	69.2645	41.1804	7	54.7613	15.6717	245	31.3958	6.43502
SMF-ME-11390A	Zr	1	132.283	30.3907	217	67.6549	17.8124	2	140.364	25.8262	156	64.5419	30.0791	3	138.301	19.536	152	47.8366	23.1838	4	60.7356	20.1347	171	36.1992	7.65037	5	53.3548	20.8266	196	34.9595	6.59576	6	200.559	21.6065	288	59.9094	48.649	7	75.645	15.4533	245	41.215	9.98845
SMF-ME-11390A	Ar	1	17.9049	4.06183	217	10.466	3.05912	2	23.067	3.09226	156	11.0354	3.35262	3	18.2635	3.5385	152	10.3233	3.00596	4	17.5034	2.45875	171	9.81461	2.88735	5	18.8448	2.54667	196	9.70876	2.73593	6	17.0307	1.71845	288	9.19385	3.03866	7	19.0723	2.75274	245	9.69451	3.08289
SMF-ME-11390A	Cl	1	7.47619	0	217	1.95549	1.90428	2	6.81228	0	156	1.76378	1.70395	3	8.38125	0	152	1.73587	1.84075	4	9.13694	0	171	2.09848	1.96155	5	9.5376	0	196	1.96319	1.89295	6	8.79937	0	288	1.93624	2.06421	7	8.28675	0	245	1.95078	1.97961
SMF-ME-11390A	Si	1	4.72899	0	217	0.835741	1.00749	2	4.25854	0	156	0.859031	1.01511	3	5.02091	0	152	1.02289	1.19464	4	6.28315	0	171	1.01829	1.14368	5	5.99439	0	196	1.18459	1.12844	6	4.30111	0	288	0.960175	0.977529	7	5.31356	0	245	1.36882	1.21054
SMF-ME-11390A	Sn	1	18.6331	3.27201	217	10.0476	3.10366	2	27.6872	2.64803	156	10.9823	4.19968	3	21.8241	2.88078	152	12.5142	3.72776	4	27.7094	6.93696	171	15.7214	3.90017	5	28.297	5.94355	196	18.2476	4.34528	6	28.3128	3.6429	288	14.295	4.63947	7	32.2917	8.09127	245	20.5157	4.08697
SMF-ME-11390A	Nb	1	60.7324	17.1818	217	35.7729	6.55192	2	55.1864	20.3529	156	33.0927	5.931	3	54.59	17.0143	152	35.5517	6.61904	4	51.9997	22.6627	171	35.3363	5.74598	5	49.4458	20.3897	196	33.7291	5.17194	6	51.9131	17.5271	288	31.7158	5.44574	7	67.3601	18.321	245	38.5343	8.22417
SMF-ME-11097B	Ba	1	260.58	0	474	31.0696	39.8927	2	45.0186	0	305	10.6577	7.74053	3	164.181	0	303	15.8093	17.911	4	391.608	0	225	16.5284	28.0153	5	101.179	0	123	17.2475	14.1053	6	156.671	0	394	16.0236	16.7671	7	31.7568	0	126	10.4037	7.49831	8	36.937	0	178	11.1096	8.34712
SMF-ME-11097B	Ca	1	786.845	6.38107	474	169.132	171.541	2	49.8002	5.4314	305	20.6861	8.3667	3	905.273	5.39555	303	111.122	182.607	4	2045.32	22.6162	225	557.127	540.129	5	2151.07	78.1368	123	1090.1	429.393	6	1879.74	5.72187	394	578.032	382.6	7	1037.6	8.80075	126	124.642	226.11	8	990.642	8.61745	178	128.317	189.913
SMF-ME-11097B	Co	1	55.6309	0	474	21.1988	10.2855	2	43.6549	0	305	18.0759	8.22291	3	49.4376	0	303	18.5076	9.97418	4	81.6333	0	225	22.3314	16.4448	5	58.4102	0	123	16.0971	10.477	6	62.815	0	394	18.9387	12.462	7	68.1067	0	126	20.2256	12.5439	8	83.3805	0	178	22.7672	14.1975
SMF-ME-11097B	Cr	1	22.4278	1.70521	474	11.2503	3.27915	2	20.4905	4.03087	305	12.2578	3.07788	3	22.5473	4.15532	303	12.1724	3.2869	4	33.8716	0	225	12.7711	4.93867	5	19.2717	1.41134	123	9.939	3.57656	6	43.362	0.559347	394	10.6361	4.54173	7	20.2886	4.22581	126	11.7037	3.35342	8	21.2631	4.02766	178	11.6843	3.09046
SMF-ME-11097B	Cu	1	70.2773	9.11311	474	28.1216	9.32249	2	61.7479	9.6223	305	31.7536	9.54337	3	77.5293	11.8158	303	30.4536	9.87284	4	57.8989	4.31697	225	26.5782	8.59555	5	33.9335	12.0101	123	21.2154	4.32317	6	37.4388	5.97175	394	20.7316	5.51546	7	54.8157	9.13934	126	27.0948	9.54618	8	64.0642	11.105	178	28.9935	8.61328
SMF-ME-11097B	Fe	1	4126.55	152.154	474	1828.13	957.416	2	1324.67	66.495	305	520.666	252.027	3	2814.42	121.852	303	1052	672.227	4	7847.98	212.583	225	2326.19	2219.63	5	7540.93	261.853	123	1369.52	1297.93	6	6202.32	125.97	394	2154.03	1497.32	7	6462.64	106.282	126	1364.87	1383	8	6870.99	274.813	178	1614	1391.8
SMF-ME-11097B	K	1	9.15777	0	474	2.40924	1.68224	2	7.14687	0	305	1.98741	1.54735	3	8.29856	0	303	2.03228	1.60528	4	8.42431	0	225	2.72536	1.80703	5	12.4883	0	123	3.47611	2.13967	6	8.22844	0	394	2.70161	1.93287	7	6.98339	0	126	1.92151	1.56299	8	11.2258	0	178	2.28197	1.70053
SMF-ME-11097B	Mn	1	133.696	16.2521	474	63.0349	23.4653	2	57.514	8.35	305	25.6594	7.65889	3	122.363	12.6954	303	40.5387	20.0462	4	176.414	4.7105	225	74.3889	35.3097	5	193.085	30.5411	123	74.7335	24.0222	6	169.423	5.65728	394	68.8368	31.6823	7	171.027	12.9556	126	49.1564	32.3313	8	418.361	19.1196	178	69.8791	51.9005
SMF-ME-11097B	Ni	1	42.8539	9.24119	474	21.3307	5.81118	2	55.6513	9.27907	305	26.5251	7.68507	3	45.8429	8.35599	303	24.6559	6.75382	4	56.5903	2.88064	225	21.212	7.50511	5	38.3818	11.3729	123	19.5372	4.19436	6	31.2893	2.91207	394	17.2266	4.59173	7	45.7811	8.7367	126	22.0672	6.61103	8	46.1667	9.06212	178	23.0897	7.20287
SMF-ME-11097B	P	1	8.45422	0	474	2.51439	1.81492	2	8.34636	0	305	2.2607	1.45706	3	9.76601	0	303	2.60919	1.71206	4	24.099	0	225	4.5158	4.25588	5	28.1628	0	123	7.08557	5.13579	6	20.9888	0	394	3.64631	3.17275	7	12.8992	0	126	3.10953	2.17553	8	14.3615	0	178	3.07867	2.03526
SMF-ME-11097B	Sr	1	156.553	18.6468	474	73.8543	23.0111	2	129.181	12.3375	305	74.0851	19.4422	3	157.68	15.5697	303	81.4419	23.3221	4	144.817	28.6641	225	75.6334	25.8351	5	162.697	44.3065	123	97.7738	23.5416	6	150.66	16.9822	394	74.6549	25.2989	7	121.316	20.6231	126	66.5243	21.0695	8	137.144	10.9311	178	71.0217	21.3379
SMF-ME-11097B	S	1	23.0416	0.24272	474	5.33922	2.81789	2	15.1778	0.153375	305	4.51711	2.36248	3	12.5389	0	303	4.53743	2.3503	4	31.9467	0	225	5.96673	3.59038	5	24.5012	0	123	7.52158	4.33035	6	14.4632	0	394	4.74062	2.66594	7	21.2872	0	126	7.39415	4.44339	8	12.1983	0	178	5.2176	2.56838
SMF-ME-11097B	Ti	1	104.039	0	474	34.6911	20.9204	2	78.9778	0	305	23.0505	14.084	3	98.9754	0	303	28.3514	20.9158	4	144.315	0	225	45.2592	33.6856	5	95.951	0	123	23.1334	20.9771	6	124.081	0	394	32.6135	21.9676	7	47.2517	0	126	16.0161	10.4448	8	61.9834	1.17932	178	23.5498	12.2587
SMF-ME-11097B	Y	1	154.96	12.4458	474	64.9753	19.919	2	169.154	15.0963	305	74.0643	21.535	3	127.062	23.4754	303	75.0454	20.9347	4	130.697	27.1877	225	57.1109	15.0224	5	95.2254	39.3595	123	63.9466	11.6362	6	101.656	17.1916	394	53.8983	13.5048	7	129.966	28.2213	126	71.598	20.7363	8	148.312	10.2687	178	69.2698	20.8872
SMF-ME-11097B	Zn	1	97.3408	13.3231	474	39.3476	11.9023	2	86.4569	13.0606	305	38.6581	12.7203	3	100.56	8.82952	303	38.7566	13.1524	4	1928.65	22.3758	225	388.209	405.717	5	8701.7	20.5319	123	665.937	1282.51	6	9171.66	21.2422	394	1008.67	1655.29	7	4629.06	19.342	126	851.65	1085.82	8	1293.09	19.0927	178	220.049	227.446
SMF-ME-11097B	Zr	1	164.09	17.3149	474	76.8253	30.4129	2	109.43	14.6907	305	58.3027	19.554	3	176.258	14.2783	303	69.368	26.8267	4	238.088	22.5814	225	121.109	47.573	5	270.675	71.9201	123	168.229	38.2135	6	231.415	15.41	394	121.53	44.3017	7	146.032	2.9915	126	62.2908	26.6154	8	141.075	7.05742	178	60.4643	24.2635
SMF-ME-11097B	Ar	1	29.2761	4.04254	474	12.796	3.63401	2	27.3869	4.81596	305	13.0963	3.34007	3	21.2719	2.12105	303	11.4949	3.33168	4	22.353	5.71954	225	12.4258	3.40383	5	28.1272	4.66678	123	13.8796	3.6422	6	32.2731	4.93601	394	13.8411	3.33594	7	19.0781	4.50906	126	12.1353	3.10182	8	20.1988	5.40081	178	12.0006	2.97718
SMF-ME-11097B	Cl	1	15.7129	0	474	4.58776	3.2086	2	16.5057	0	305	6.4046	3.43626	3	17.7467	0	303	6.53056	3.43343	4	14.0606	0	225	3.61027	2.96836	5	9.35565	0	123	3.22952	2.31481	6	10.6564	0	394	2.7392	2.20939	7	16.5663	0	126	6.25089	3.56864	8	13.6148	0	178	4.49466	2.89039
SMF-ME-11097B	Si	1	7.4163	0	474	2.46196	1.70894	2	7.9934	0	305	2.85197	1.76819	3	9.50372	0	303	3.09412	1.91407	4	8.0221	0	225	2.15223	1.60672	5	8.35559	0	123	2.37935	1.67124	6	7.64998	0	394	1.95089	1.53754	7	7.4155	0	126	2.43005	1.57015	8	7.95652	0	178	2.50649	1.83197
SMF-ME-11097B	Sn	1	40.723	9.08793	474	26.0129	5.3948	2	41.1109	13.2663	305	25.233	4.34747	3	44.4086	15.8254	303	27.661	5.15824	4	32.3059	6.01582	225	17.6324	4.92942	5	24.2178	1.23778	123	11.6714	3.89439	6	24.6556	1.63969	394	10.9425	4.31311	7	40.9533	13.9012	126	27.0786	5.77033	8	46.4485	14.4067	178	28.0119	6.37609
SMF-ME-0758A	Ba	1	98.4823	0	266	29.9394	19.0236	2	86.4294	0	308	29.0099	18.544	3	222.698	0	485	35.2039	28.232	4	52.7391	0	340	15.9132	9.30759	5	110.464	0	606	27.6357	18.3959	6	55.0709	0	639	15.4411	8.90352	7	65.905	0	237	17.1094	11.5652	8	124.363	0	206	29.9853	24.2884
SMF-ME-0758A	Ca	1	160.624	29.5903	266	71.2811	22.4198	2	180.82	17.6153	308	57.3367	24.677	3	2367.08	19.7139	485	799.549	704.244	4	685.789	27.2479	340	126.857	142.287	5	1662.9	15.9987	606	212.344	369.635	6	1906.44	38.7286	639	477.512	288.507	7	380.151	164.48	237	259.766	47.2709	8	2110.8	90.1115	206	427.225	471.27
SMF-ME-0758A	Co	1	74.5095	0	266	25.0744	14.795	2	63.9501	0	308	24.2642	13.8442	3	76.1777	0	485	23.4563	14.5732	4	86.0629	0	340	25.598	14.4814	5	76.9693	0	606	24.4015	14.8771	6	123.328	0	639	41.7115	19.5738	7	96.1942	0	237	42.417	19.0417	8	97.4229	0	206	27.7	16.1265
SMF-ME-0758A	Cr	1	26.9386	9.05077	266	17.5479	3.64962	2	30.6718	7.52688	308	17.5086	4.11215	3	40.0336	3.37257	485	15.634	4.68145	4	34.5277	10.2021	340	16.7617	3.48312	5	46.9683	3.82213	606	17.7445	4.78414	6	28.3538	5.91276	639	16.1764	4.0971	7	30.6232	6.61144	237	17.9243	4.31942	8	36.4989	5.63562	206	19.2494	5.58909
SMF-ME-0758A	Cu	1	76.1102	4.52404	266	33.8665	11.8679	2	72.3351	4.65622	308	36.1282	12.4778	3	107.13	14.7827	485	38.5186	14.8245	4	102.468	16.7481	340	51.9285	17.5972	5	186.415	18.9076	606	104.667	34.7216	6	309.028	23.7793	639	132.458	51.7654	7	344.27	104.79	237	221.194	41.5875	8	429.221	17.6033	206	134.413	84.0423
SMF-ME-0758A	Fe	1	3779.01	944.298	266	2254.61	509.683	2	3252.46	445.736	308	1788.56	613.642	3	4447.6	189.048	485	2075.41	1080.49	4	2639.91	669.882	340	1753.12	361.999	5	3605.76	175.592	606	1641.01	1009.1	6	10076.8	610.49	639	2854.43	921.504	7	4257.9	1628.87	237	3105.11	654.352	8	5898.18	802.225	206	2237.06	1094.3
SMF-ME-0758A	K	1	14.4215	0	266	5.57055	2.43533	2	12.5001	0.639634	308	5.59799	2.24833	3	35.1297	0	485	5.71079	3.15751	4	11.2556	0	340	3.35286	2.06646	5	10.797	0	606	3.95861	2.18356	6	11.069	0	639	3.46207	2.04835	7	11.3188	0	237	3.5367	2.13425	8	12.6781	0.337388	206	6.42373	2.69777
SMF-ME-0758A	Mn	1	165.088	8.67519	266	28.6655	14.1126	2	47.5781	5.83503	308	21.0818	7.63328	3	110.287	8.41385	485	53.3402	19.7827	4	54.8807	5.2384	340	19.1417	7.7428	5	68.7528	4.9277	606	26.4841	10.8101	6	81.6248	4.52418	639	27.1043	13.7981	7	48.0613	7.50111	237	22.4558	7.14272	8	126.131	7.50701	206	42.1948	21.6015
SMF-ME-0758A	Ni	1	58.5692	1.53544	266	30.5357	9.4541	2	68.1812	7.36719	308	30.8665	10.4217	3	80.7895	10.951	485	32.3745	10.5123	4	86.4826	9.9586	340	33.7449	12.5016	5	73.415	4.17125	606	33.2997	11.8793	6	195.593	6.73981	639	108.016	32.5609	7	180.545	42.2546	237	103.557	27.5907	8	82.2915	11.1641	206	38.6814	13.5216
SMF-ME-0758A	P	1	10.3319	0	266	3.96908	1.86182	2	15.3843	0	308	4.51739	2.20148	3	42.2391	0	485	7.71533	7.16298	4	11.4481	0	340	3.48799	1.96989	5	28.3511	0	606	5.11318	4.66823	6	24.4829	0	639	4.70481	3.88823	7	13.0463	0	237	3.40917	2.14701	8	20.4744	0	206	4.49795	3.3962
SMF-ME-0758A	Sr	1	195.356	23.9392	266	114.769	26.9185	2	208.201	42.0652	308	121.73	25.716	3	251.812	44.506	485	144.614	39.4642	4	181.351	48.3133	340	108.301	25.0322	5	228.185	45.5974	606	111.437	26.4656	6	213.369	31.3389	639	109.514	26.6279	7	165.354	22.7369	237	97.2658	22.9906	8	205.34	35.025	206	108.315	30.6377
SMF-ME-0758A	S	1	18.1139	0.352881	266	8.84772	3.19039	2	21.4733	1.16838	308	9.00563	3.37315	3	27.5554	0.405223	485	10.8202	3.7107	4	50.3433	3.93163	340	24.3945	6.35097	5	41.3966	0.944396	606	20.5506	7.02506	6	39.5045	5.72269	639	17.5242	5.5364	7	23.5618	4.22981	237	13.8639	3.54972	8	42.2693	5.30165	206	17.096	6.40258
SMF-ME-0758A	Ti	1	302.281	47.7941	266	168.537	49.2558	2	314.303	0	308	162.102	59.6461	3	293.225	0	485	93.2895	67.8434	4	75.2342	0	340	28.114	13.3159	5	206.651	0	606	79.4675	49.4188	6	104.35	0	639	21.6417	18.1539	7	214.13	2.97733	237	60.4215	41.0894	8	371.825	0	206	145.448	72.6625
SMF-ME-0758A	Y	1	190.266	56.9558	266	113.648	24.5764	2	203.753	25.3018	308	119.849	26.206	3	198.516	27.3194	485	111.078	26.1164	4	172.128	52.7714	340	111.057	22.7839	5	177.347	32.4281	606	109.32	25.3024	6	209.704	0	639	108.551	25.5212	7	168.499	53.742	237	105.549	20.9492	8	160.275	24.6066	206	86.0383	24.4167
SMF-ME-0758A	Zn	1	111.122	2.96709	266	56.2815	17.4351	2	121.464	11.4755	308	54.2515	17.9224	3	344.052	43.3059	485	148.987	47.3394	4	227.521	23.7063	340	100.713	39.1844	5	344.677	62.7161	606	189.628	51.4815	6	649.545	131.474	639	390.762	109.987	7	707.802	349.285	237	510.13	68.9986	8	677.875	20.8278	206	167.433	103.911
SMF-ME-0758A	Zr	1	152.332	22.005	266	93.2187	24.0806	2	194.696	36.9001	308	97.6506	23.9252	3	232.198	2.86846	485	120.069	38.6539	4	164.843	16.8102	340	89.9748	25.2729	5	216.849	11.9743	606	90.4542	24.6324	6	213.758	15.433	639	94.9542	28.5656	7	160.597	22.6295	237	85.0286	24.9101	8	235.683	20.9059	206	104.085	42.8771
SMF-ME-0758A	Ar	1	23.0334	5.99392	266	12.9341	3.05428	2	19.9453	4.83673	308	11.8671	3.04662	3	27.1444	4.86198	485	14.4271	3.68338	4	30.2702	7.12833	340	15.0235	3.93435	5	25.1608	4.7774	606	13.9005	3.51677	6	29.3272	6.16228	639	14.4734	3.72188	7	28.8396	6.62491	237	14.7677	3.69991	8	26.952	6.67752	206	15.5318	3.45524
SMF-ME-0758A	Cl	1	9.81063	0	266	3.12784	2.32186	2	12.393	0	308	3.29825	2.5391	3	11.2314	0	485	3.58943	2.57152	4	16.578	0	340	3.57476	2.57532	5	13.7641	0	606	3.74814	2.77571	6	12.0821	0	639	3.79764	2.61473	7	10.8521	0	237	3.09114	2.37683	8	12.0628	0	206	4.1648	2.70963
SMF-ME-0758A	Si	1	12.7231	0	266	5.99785	2.43033	2	13.3963	0.273022	308	6.21371	2.51149	3	12.3557	0	485	5.22837	2.5069	4	8.70222	0	340	3.0292	1.75777	5	9.41481	0	606	3.0573	1.85523	6	10.2607	0	639	2.79001	1.79281	7	10.4481	0	237	3.0903	1.939	8	11.8262	0	206	4.3716	2.49915
SMF-ME-0758A	Sn	1	59.734	31.0959	266	43.9938	4.8645	2	59.7165	31.3631	308	45.2642	5.03745	3	63.4107	23.0755	485	40.8635	6.80908	4	58.0495	30.4341	340	42.0971	4.90443	5	70.0294	18.4928	606	41.0273	6.23248	6	61.2965	27.1258	639	44.2488	5.72836	7	61.6524	30.8452	237	45.4841	5.86095	8	54.5465	16.1174	206	33.3422	7.52409
[truncated: 6 more columns]
