# Supplementary material for: Application of mobile-macroscale scanning X-ray fluorescence (mobile-MA-XRF) imaging in paleontology: analyses of vertebrate fossil specimens from Messel conserved in different solid and liquid media
Source: Royal Society of Chemistry journal article supplement (doi:10.1039/d4ja00310a), 2025-01-01
Supplement: d4ja00310a2.xlsx [file d4ja00310a2.xlsx]

## Sheet: Loadings Fig. 7A
Dataset S2 - Loadings of LDA chemospace shown in Fig. 7A
Element	LD1	LD2	LD3	LD4	LD5	LD6	LD7	LD8
Ca	0.0062437	0.0010611	0.00223257	-0.00303662	-0.00423911	-0.00190399	0.000289264	0.00381343
Co	0.10704	-0.0528437	0.507737	0.273205	-0.131234	-0.158385	0.0586996	0.0459516
Cr	-0.480332	0.706351	-0.100135	-0.144137	-0.0734129	0.131156	-0.173239	-0.188258
Cu	-0.0107906	-0.0141619	0.00850144	-0.00447827	0.0138489	-0.00180115	-0.0100377	0.0182109
Fe	-0.000844756	0.000270073	-0.00240456	-0.00178426	0.00129312	0.000865757	-0.000729314	-0.000627866
K	-0.411783	-0.367289	0.63717	-1.10088	-0.6238	0.575293	0.159055	-0.0762699
Mn	0.00784493	0.00282344	0.00807466	0.00499407	-0.00227727	0.00149621	0.0107249	0.00540331
Ni	-0.0213417	0.00498233	-0.0774814	-0.0427265	0.0287917	0.0285964	0.00669381	-0.0114074
P	-1.04636	0.1795	-0.470887	1.00816	0.605597	0.930336	-0.307797	-0.594834
Sr	-0.0561525	-0.059434	0.0303492	0.0156405	0.00699219	-0.0623865	0.0143552	0.0248663
S	-0.0677486	0.0363011	-0.0299909	-0.029385	-0.00395911	0.00579714	0.0403141	0.0109824
Ti	0.0103456	-0.0186763	-0.00156134	0.0138689	0.00105101	-0.0121416	0.00903207	0.000648155
Zn	0.000181861	-0.00245384	-0.000443721	0.00133463	-0.0021566	-0.00218461	-0.00188933	-0.00314543

## Sheet: Loadings Fig. 7B
Dataset S2 - Loadings of LDA chemospace shown in Fig. 7B
Element	LD1	LD2	LD3	LD4	LD5	LD6	LD7	LD8
Ca	0.00106	0.000983	-0.00189	0.00123	0.00387	-0.000932	0.00212	0.00143
Co	-0.111	0.543	-0.203	0.0435	-0.00944	-0.00719	-0.0153	0.291
Cu	-0.0185	0.0053	0.0168	-0.00257	0.0173	0.0044	-0.00876	-0.00404
Fe	0.000458	-0.0027	0.0018	-0.000762	8.27e-05	0.000101	0.000588	-0.00157
Mn	0.011	0.00908	-0.00403	0.00492	-0.00738	0.00146	-0.00662	-0.0199
Ni	0.0176	-0.0841	0.0362	-0.0016	-0.0131	0.0061	0.0165	-0.0611
Sr	-0.0936	0.0218	-0.00204	-0.0271	-0.0261	0.0272	0.0117	-0.0377
S	-0.0571	-0.0264	0.00576	0.0669	0.000321	-0.0182	-0.0055	0.0361
Ti	-0.0131	0.00234	-0.000915	0.00549	0.00365	-0.0262	-0.0107	0.0106
Zn	-7.94e-05	-0.000676	-0.00211	-0.00439	-0.00194	-0.00137	-0.00142	0.000481

## Sheet: Loadings Fig. 7C
Dataset S2 - Loadings of LDA chemospace shown in Fig. 7C
Element	LD1	LD2	LD3
Ca	0.00497606	2.27022e-05	-0.000844185
Co	0.30758	0.0553571	-0.117262
Cr	0.21103	-0.0669712	-0.258557
Cu	0.000193316	-0.0124647	0.0150597
Fe	-0.000667547	-0.000121748	0.00105715
K	0.33983	-0.261804	-0.482548
Mn	-0.0128476	-0.0111129	-0.0106823
Ni	-0.0408166	-0.0272909	0.0154132
P	-0.598346	0.0958188	-0.0478501
Sr	-0.00674601	-0.0120752	0.00846937
S	-0.0658596	0.0225496	-0.00958847
Ti	-0.0286202	0.0250744	0.0167008
Zn	-0.0059828	-0.00202297	0.00122344

## Sheet: Loadings Fig. 7D
Dataset S2 - Loadings of LDA chemospace shown in Fig. 7D
Element	LD1	LD2	LD3
Ca	0.00140468	0.000161347	-0.00191142
Co	0.256902	0.0136007	-0.236733
Cu	-0.00152494	-0.0149847	0.0121555
Fe	-0.000588199	-8.61e-05	0.00183529
Mn	-0.0127672	-0.00725188	-0.00923737
Ni	-0.0417389	-0.0186947	0.0392988
Sr	-0.0216115	-0.00807869	0.00724548
S	-0.0625419	0.0386418	0.0089017
Ti	-0.00576644	0.018766	-0.00151072
Zn	-0.00247427	-0.0023192	-0.00191261
